# Supplementary material for: A Novel Widespread Cryptic Species and Phylogeographic Patterns within Several Giant Clam Species (Cardiidae: Tridacna) from the Indo-Pacific Ocean
Source: PLoS One. 2013 Nov 20;8(11):e80858. doi: 10.1371/journal.pone.0080858 (PMC3835327; doi:10.1371/journal.pone.0080858)
Supplement: Document S1 — Genbank accession numbers for all included sequences. (XLS) [file pone.0080858.s001.xls]

## Sheet: COI
COI
Study Source	Acc No	Locality	Name used in study	Putative species	Latitude (decimal degrees)	Longitude (decimal degrees)
Tang unpublished	DQ269479	Taiwan		crocea
Nuryanto et al. 2007	EU003606	W. Sulawesi	Spermonde01	crocea
Nuryanto et al. 2007	EU003607	W. Sulawesi	Spermonde02	crocea
Nuryanto et al. 2007	EU003608	W. Java	PulauSeribu01	crocea
Nuryanto et al. 2007	EU003609	W. Papua	Biak01	crocea
DeBoer et al. 2008	EU341350	Indonesia	TSD_20	crocea
DeBoer et al. 2008	EU341351	Indonesia	TSD_21	crocea
DeBoer et al. 2008	EU341352	Indonesia	TSD_22	crocea
DeBoer et al. 2008	EU341353	Indonesia	TSD_23	crocea
DeBoer et al. 2008	EU341354	Indonesia	TSD_24	crocea
DeBoer et al. 2008	EU341355	Indonesia	TSD_25	crocea
DeBoer et al. 2008	EU341356	Indonesia	TSD_26	crocea
DeBoer et al. 2008	EU341357	Indonesia	TSD_27	crocea
DeBoer et al. 2008	EU341358	Indonesia	TSD_28	crocea
DeBoer et al. 2008	EU341359	Indonesia	TSD_29	crocea
DeBoer et al. 2008	EU341360	Indonesia	TSD_30	crocea
DeBoer et al. 2008	EU341361	Indonesia	TSD_31	crocea
DeBoer et al. 2008	EU341362	Indonesia	TSD_32	crocea
DeBoer et al. 2008	EU341363	Indonesia	TSD_33	crocea
DeBoer et al. 2008	EU341364	Indonesia	TSD_34	crocea
DeBoer et al. 2008	EU341365	Indonesia	TSD_35	crocea
DeBoer et al. 2008	EU341366	Indonesia	TSD_36	crocea
DeBoer et al. 2008	EU341367	Indonesia	TSD_37	crocea
DeBoer et al. 2008	EU341368	Indonesia	TSD_38	crocea
DeBoer et al. 2008	EU341369	Indonesia	TSD_39	crocea
DeBoer et al. 2008	EU341370	Indonesia	TSD_40 (grey)	crocea
DeBoer et al. 2008	EU341371	Indonesia	TSD_41 (grey)	crocea
DeBoer et al. 2008	EU341372	Indonesia	TSD_42 (grey)	crocea
DeBoer et al. 2008	EU341373	Indonesia	TSD_43 (grey)	crocea
DeBoer et al. 2008	EU341374	Indonesia	TSD_44 (grey)	crocea
DeBoer et al. 2008	EU341375	Indonesia	TSD_45 (grey)	crocea
DeBoer et al. 2008	EU341376	Indonesia	TSD_46 (grey)	crocea
DeBoer et al. 2008	EU341377	Indonesia	TSD_47 (grey)	crocea
DeBoer et al. 2008	EU341378	Indonesia	TSD_48 (grey)	crocea
DeBoer et al. 2008	EU341379	Indonesia	TSD_49 (grey)	crocea
Kochzius & Nuryanto 2008	FM253431	Indonesia	Hap_1	crocea
Kochzius & Nuryanto 2008	FM253432	Biak	Hap_2_yell	crocea
Kochzius & Nuryanto 2008	FM253433	Biak	Hap_3_yell	crocea
Kochzius & Nuryanto 2008	FM253434	Indonesia	Hap_4	crocea
Kochzius & Nuryanto 2008	FM253435	Indonesia	Hap_5	crocea
Kochzius & Nuryanto 2008	FM253436	Indonesia	Hap_6	crocea
Kochzius & Nuryanto 2008	FM253437	Biak	Hap_7_yell	crocea
Kochzius & Nuryanto 2008	FM253438	Biak	Hap_8_yell	crocea
Kochzius & Nuryanto 2008	FM253439	Indonesia	Hap_9	crocea
Kochzius & Nuryanto 2008	FM253440	Indonesia	Hap_10	crocea
Kochzius & Nuryanto 2008	FM253441	Biak	Hap_11_yell	crocea
Kochzius & Nuryanto 2008	FM253442	Indonesia	Hap_12	crocea
Kochzius & Nuryanto 2008	FM253443	Indonesia	Hap_13	crocea
Kochzius & Nuryanto 2008	FM253444	Indonesia	Hap_14	crocea
Kochzius & Nuryanto 2008	FM253445	Indonesia	Hap_15	crocea
Kochzius & Nuryanto 2008	FM253446	Indonesia	Hap_16	crocea
Kochzius & Nuryanto 2008	FM253447	Indonesia	Hap_17	crocea
Kochzius & Nuryanto 2008	FM253448	Indonesia	Hap_18	crocea
Kochzius & Nuryanto 2008	FM253449	Indonesia	Hap_19	crocea
Kochzius & Nuryanto 2008	FM253450	Indonesia	Hap_20	crocea
Kochzius & Nuryanto 2008	FM253451	Indonesia	Hap_21	crocea
Kochzius & Nuryanto 2008	FM253452	Indonesia	Hap_22	crocea
Kochzius & Nuryanto 2008	FM253453	Indonesia	Hap_23	crocea
Kochzius & Nuryanto 2008	FM253454	Indonesia	Hap_24	crocea
Kochzius & Nuryanto 2008	FM253455	Indonesia	Hap_25	crocea
Kochzius & Nuryanto 2008	FM253456	Indonesia	Hap_26	crocea
Kochzius & Nuryanto 2008	FM253457	Indonesia	Hap_27	crocea
Kochzius & Nuryanto 2008	FM253458	Indonesia	Hap_28	crocea
Kochzius & Nuryanto 2008	FM253459	Indonesia	Hap_29	crocea
Kochzius & Nuryanto 2008	FM253460	Indonesia	Hap_30	crocea
Kochzius & Nuryanto 2008	FM253461	Indonesia	Hap_31	crocea
Kochzius & Nuryanto 2008	FM253462	Indonesia	Hap_32	crocea
Kochzius & Nuryanto 2008	FM253463	Indonesia	Hap_33	crocea
Kochzius & Nuryanto 2008	FM253464	Indonesia	Hap_34	crocea
Kochzius & Nuryanto 2008	FM253465	Indonesia	Hap_35	crocea
Kochzius & Nuryanto 2008	FM253466	Indonesia	Hap_36	crocea
Kochzius & Nuryanto 2008	FM253467	Indonesia	Hap_37	crocea
Kochzius & Nuryanto 2008	FM253468	Indonesia	Hap_38	crocea
Kochzius & Nuryanto 2008	FM253469	Indonesia	Hap_39	crocea
Kochzius & Nuryanto 2008	FM253470	Indonesia	Hap_40	crocea
Kochzius & Nuryanto 2008	FM253471	Indonesia	Hap_41	crocea
Kochzius & Nuryanto 2008	FM253472	Indonesia	Hap_42	crocea
Kochzius & Nuryanto 2008	FM253473	Indonesia	Hap_43	crocea
Kochzius & Nuryanto 2008	FM253474	Indonesia	Hap_44	crocea
Kochzius & Nuryanto 2008	FM253475	Indonesia	Hap_45	crocea
Kochzius & Nuryanto 2008	FM253476	Indonesia	Hap_46	crocea
Kochzius & Nuryanto 2008	FM253477	Indonesia	Hap_47	crocea
Kochzius & Nuryanto 2008	FM253478	Indonesia	Hap_48	crocea
Kochzius & Nuryanto 2008	FM253479	Indonesia	Hap_49	crocea
Kochzius & Nuryanto 2008	FM253480	Indonesia	Hap_50	crocea
Kochzius & Nuryanto 2008	FM253481	Indonesia	Hap_51	crocea
Kochzius & Nuryanto 2008	FM253482	Indonesia	Hap_52	crocea
Kochzius & Nuryanto 2008	FM253483	Indonesia	Hap_53	crocea
Kochzius & Nuryanto 2008	FM253484	Indonesia	Hap_54	crocea
Kochzius & Nuryanto 2008	FM253485	Indonesia	Hap_55	crocea
Kochzius & Nuryanto 2008	FM253486	Indonesia	Hap_56	crocea
Kochzius & Nuryanto 2008	FM253487	Indonesia	Hap_57	crocea
Kochzius & Nuryanto 2008	FM253488	Indonesia	Hap_58	crocea
Kochzius & Nuryanto 2008	FM253489	Indonesia	Hap_59	crocea
Kochzius & Nuryanto 2008	FM253490	Indonesia	Hap_60	crocea
Kochzius & Nuryanto 2008	FM253491	Indonesia	Hap_61	crocea
Kochzius & Nuryanto 2008	FM253492	Indonesia	Hap_62	crocea
Kochzius & Nuryanto 2008	FM253493	Indonesia	Hap_63	crocea
Kochzius & Nuryanto 2008	FM253494	Indonesia	Hap_64	crocea
Kochzius & Nuryanto 2008	FM253495	Indonesia	Hap_65	crocea
Kochzius & Nuryanto 2008	FM253496	Indonesia	Hap_66	crocea
Kochzius & Nuryanto 2008	FM253497	Indonesia	Hap_67	crocea
Kochzius & Nuryanto 2008	FM253498	Indonesia	Hap_68	crocea
Kochzius & Nuryanto 2008	FM253499	Indonesia	Hap_69	crocea
Kochzius & Nuryanto 2008	FM253500	Indonesia	Hap_70	crocea
Kochzius & Nuryanto 2008	FM253501	Indonesia	Hap_71	crocea
Kochzius & Nuryanto 2008	FM253502	Indonesia	Hap_72	crocea
Kochzius & Nuryanto 2008	FM253503	Indonesia	Hap_73	crocea
Kochzius & Nuryanto 2008	FM253504	Indonesia	Hap_74	crocea
Kochzius & Nuryanto 2008	FM253505	Indonesia	Hap_75	crocea
Kochzius & Nuryanto 2008	FM253506	Indonesia	Hap_76	crocea
Kochzius & Nuryanto 2008	FM253507	Indonesia	Hap_77	crocea
Kochzius & Nuryanto 2008	FM253508	Indonesia	Hap_78	crocea
Kochzius & Nuryanto 2008	FM253509	Indonesia	Hap_79	crocea
Kochzius & Nuryanto 2008	FM253510	Indonesia	Hap_80	crocea
Kochzius & Nuryanto 2008	FM253511	Indonesia	Hap_81	crocea
Kochzius & Nuryanto 2008	FM253512	Indonesia	Hap_82	crocea
Kochzius & Nuryanto 2008	FM253513	Indonesia	Hap_83	crocea
Kochzius & Nuryanto 2008	FM253514	Indonesia	Hap_84	crocea
Kochzius & Nuryanto 2008	FM253515	Indonesia	Hap_85	crocea
Kochzius & Nuryanto 2008	FM253516	Indonesia	Hap_86	crocea
Kochzius & Nuryanto 2008	FM253517	Indonesia	Hap_87	crocea
Kochzius & Nuryanto 2008	FM253518	Indonesia	Hap_88	crocea
Kochzius & Nuryanto 2008	FM253519	Indonesia	Hap_89	crocea
Kochzius & Nuryanto 2008	FM253520	Indonesia	Hap_90	crocea
Kochzius & Nuryanto 2008	FM253521	Indonesia	Hap_91	crocea
Kochzius & Nuryanto 2008	FM253522	Indonesia	Hap_92	crocea
Kochzius & Nuryanto 2008	FM253523	Indonesia	Hap_93	crocea
Kochzius & Nuryanto 2008	FM253524	Indonesia	Hap_94	crocea
Kochzius & Nuryanto 2008	FM253525	Sumatra	Hap_95_Red	crocea
Kochzius & Nuryanto 2008	FM253526	Sumatra	Hap_96_Red	crocea
Kochzius & Nuryanto 2008	FM253527	Sumatra	Hap_97_Red	crocea
Kochzius & Nuryanto 2008	FM253528	Sumatra	Hap_98_Red	crocea
Kochzius & Nuryanto 2008	FM253529	Sumatra	Hap_99_Red	crocea
Kochzius & Nuryanto 2008	FM253530	Indonesia	Hap_100	crocea
Kochzius & Nuryanto 2008	FM253531	Indonesia	Hap_101	crocea
Kochzius & Nuryanto 2008	FM253532	Indonesia	Hap_102	crocea
Kochzius & Nuryanto 2008	FM253533	Indonesia	Hap_103	crocea
Kochzius & Nuryanto 2008	FM253534	Indonesia	Hap_104	crocea
Kochzius & Nuryanto 2008	FM253535	Indonesia	Hap_105	crocea
Kochzius & Nuryanto 2008	FM253536	Indonesia	Hap_106	crocea
Kochzius & Nuryanto 2008	FM253537	Indonesia	Hap_107	crocea
Kochzius & Nuryanto 2008	FM253538	Indonesia	Hap_108	crocea
Kochzius & Nuryanto 2008	FM253539	Indonesia	Hap_109	crocea
Kochzius & Nuryanto 2008	FM253540	Indonesia	Hap_110	crocea
Kochzius & Nuryanto 2008	FM253541	Indonesia	Hap_111	crocea
Kochzius & Nuryanto 2008	FM253542	Indonesia	Hap_112	crocea
Kochzius & Nuryanto 2008	FM253543	Indonesia	Hap_113	crocea
Kochzius & Nuryanto 2008	FM253544	Indonesia	Hap_114	crocea
Kochzius & Nuryanto 2008	FM253545	Indonesia	Hap_115	crocea
Kochzius & Nuryanto 2008	FM253546	Indonesia	Hap_116	crocea
Kochzius & Nuryanto 2008	FM253547	Indonesia	Hap_117	crocea
Kochzius & Nuryanto 2008	FM253548	Indonesia	Hap_118	crocea
Kochzius & Nuryanto 2008	FM253549	Indonesia	Hap_119	crocea
Kochzius & Nuryanto 2008	FM253550	Indonesia	Hap_120	crocea
Kochzius & Nuryanto 2008	FM253551	Indonesia	Hap_121	crocea
Kochzius & Nuryanto 2008	FM253552	Indonesia	Hap_122	crocea
Kochzius & Nuryanto 2008	FM253553	Indonesia	Hap_123	crocea
Kochzius & Nuryanto 2008	FM253554	Indonesia	Hap_124	crocea
Kochzius & Nuryanto 2008	FM253555	Indonesia	Hap_125	crocea
Kochzius & Nuryanto 2008	FM253556	Indonesia	Hap_126	crocea
Kochzius & Nuryanto 2008	FM253557	Indonesia	Hap_127	crocea
Kochzius & Nuryanto 2008	FM253558	Indonesia	Hap_128	crocea
Kochzius & Nuryanto 2008	FM253559	Indonesia	Hap_129	crocea
Kochzius & Nuryanto 2008	FM253560	Indonesia	Hap_130	crocea
Kochzius & Nuryanto 2008	FM253561	Indonesia	Hap_131	crocea
Kochzius & Nuryanto 2008	FM253562	Indonesia	Hap_132	crocea
Neo & Todd 2012	JN392040	Singapore	NML_32	crocea
Neo & Todd 2012	JN392041	Singapore	NML_56	crocea
Neo & Todd 2012	JN392042	Singapore	NML_66	crocea
Neo & Todd 2012	JN392043	Singapore	NML_41	crocea
Neo & Todd 2012	JN392044	Singapore	NML_30	crocea
Neo & Todd 2012	JN392045	Singapore	NML_43	crocea
Neo & Todd 2012	JN392046	Singapore	NML_29	crocea
Neo & Todd 2012	JN392047	Singapore	NML_31	crocea
Neo & Todd 2012	JN392048	Singapore	NML_39	crocea
Neo & Todd 2012	JN392049	Singapore	NML_57	crocea
Neo & Todd 2012	JN392050	Singapore	NML_59	crocea
Neo & Todd 2012	JN392051	Singapore	NML_64	crocea
Neo & Todd 2012	JN392052	Singapore	NML_58	crocea
Neo & Todd 2012	JN392053	Singapore	NML_67	crocea
Neo & Todd 2012	JN392054	Singapore	NML_35	crocea
Neo & Todd 2012	JN392055	Singapore	NML_42	crocea
Neo & Todd 2012	JN392056	Singapore	NML_65	crocea
Neo & Todd 2012	JN392057	Singapore	NML_34	crocea
Neo & Todd 2012	JN392058	Singapore	NML_36	crocea
Neo & Todd 2012	JN392059	Singapore	NML_60	crocea
Neo & Todd 2012	JN392060	Singapore	NML_62	crocea
Neo & Todd 2012	JN392061	Singapore	NML_40	crocea
Neo & Todd 2012	JN392062	Singapore	NML_33	crocea
Neo & Todd 2012	JN392063	Singapore	NML_63	crocea
Neo & Todd 2012	JN392064	Singapore	NML_38	crocea
Neo & Todd 2012	JN392065	Singapore	NML_37	crocea
Neo & Todd 2012	JN392066	Singapore	NML_61	crocea
Plazza & Passamont 2010	GQ166591	?		derasa
Nuryanto et al. 2008	EU003616	E. Sulawesi (Togian)	Indonesia01	gigas
Tang & Chen, unplublished	DQ155301	Taiwan	Tridacna maxima	maxima
Nuryanto et al. 2007	EU003610	W. Sumatra	Padang01	maxima
Nuryanto et al. 2007	EU003611	W. Sulawesi	Spermonde01	maxima
Nuryanto et al. 2007	EU003612	E. Sulawesi	Togian01	maxima
Nuryanto et al. 2007	EU003613	W. Papua	Biak01	maxima
Nuryanto et al. 2007	EU003614	W. Java	PulauSeribu01	maxima
DeBoer et al. unpublished	EU346364	Indonesia	TSD53	maxima
DeBoer et al. unpublished	EU346365	Indonesia	TSD54	maxima
DeBoer et al. unpublished	EU346366	Indonesia	TSD55	maxima
DeBoer et al. unpublished	EU346367	Indonesia	TSD56	maxima
DeBoer et al. unpublished	EU346368	Indonesia	TSD57	maxima
Nuryanto & Kochzius 2009	FM244476	Red Sea	Hap_1_Red	maxima
Nuryanto & Kochzius 2009	FM244477	Red Sea	Hap_2_Red	maxima
Nuryanto & Kochzius 2009	FM244478	Red Sea	Hap_3_Red	maxima
Nuryanto & Kochzius 2009	FM244479	Red Sea	Hap_4_Red	maxima
Nuryanto & Kochzius 2009	FM244480	Red Sea	Hap_5_Red	maxima
Nuryanto & Kochzius 2009	FM244481	Red Sea	Hap_6_Red	maxima
Nuryanto & Kochzius 2009	FM244482	Red Sea	Hap_7_Red	maxima
Nuryanto & Kochzius 2009	FM244483	Red Sea	Hap_8_Red	maxima
Nuryanto & Kochzius 2009	FM244484	Red Sea	Hap_9_Red	maxima
Nuryanto & Kochzius 2009	FM244485	Red Sea	Hap_10_Red	maxima
Nuryanto & Kochzius 2009	FM244513	Java & Sumatra	Hap_11_orange	maxima
Nuryanto & Kochzius 2009	FM244514	Java & Sumatra	Hap_12_orange	maxima
Nuryanto & Kochzius 2009	FM244515	Java & Sumatra	Hap_13_orange	maxima
Nuryanto & Kochzius 2009	FM244516	Java & Sumatra	Hap_14_orange	maxima
Nuryanto & Kochzius 2009	FM244517	Java & Sumatra	Hap_15_orange	maxima
Nuryanto & Kochzius 2009	FM244518	Java & Sumatra	Hap_16_orange	maxima
Nuryanto & Kochzius 2009	FM244519	Java & Sumatra	Hap_17_orange	maxima
Nuryanto & Kochzius 2009	FM244520	Java & Sumatra	Hap_18_orange	maxima
Nuryanto & Kochzius 2009	FM244521	Java & Sumatra	Hap_19_orange	maxima
Nuryanto & Kochzius 2009	FM244522	Java & Sumatra	Hap_20_orange	maxima
Nuryanto & Kochzius 2009	FM244523	Java & Sumatra	Hap_21_orange	maxima
Nuryanto & Kochzius 2009	FM244524	Java & Sumatra	Hap_22_orange	maxima
Nuryanto & Kochzius 2009	FM244525	Java & Sumatra	Hap_23_orange	maxima
Nuryanto & Kochzius 2009	FM244526	Java & Sumatra	Hap_24_orange	maxima
Nuryanto & Kochzius 2009	FM244527	Java & Sumatra	Hap_25_orange	maxima
Nuryanto & Kochzius 2009	FM244528	Java & Sumatra	Hap_26_orange	maxima
Nuryanto & Kochzius 2009	FM244529	Java & Sumatra	Hap_27_orange	maxima
Nuryanto & Kochzius 2009	FM244530	Java & Sumatra	Hap_28	maxima
Nuryanto & Kochzius 2009	FM244531	Java & Sumatra	Hap_29_orange	maxima
Nuryanto & Kochzius 2009	FM244532	Java & Sumatra	Hap_30_orange	maxima
Nuryanto & Kochzius 2009	FM244533	Java & Sumatra	Hap_31_orange	maxima
Nuryanto & Kochzius 2009	FM244534	Java & Sumatra	Hap_32_orange	maxima
Nuryanto & Kochzius 2009	FM244535	Central Indonesia	Hap_33	maxima
Nuryanto & Kochzius 2009	FM244536	Central Indonesia	Hap_34	maxima
Nuryanto & Kochzius 2009	FM244537	Central Indonesia	Hap_35	maxima
Nuryanto & Kochzius 2009	FM244538	Central Indonesia	Hap_36	maxima
Nuryanto & Kochzius 2009	FM244539	Central Indonesia	Hap_37	maxima
Nuryanto & Kochzius 2009	FM244540	Central Indonesia	Hap_38	maxima
Nuryanto & Kochzius 2009	FM244541	Central Indonesia	Hap_39	maxima
Nuryanto & Kochzius 2009	FM244542	Central Indonesia	Hap_40	maxima
Nuryanto & Kochzius 2009	FM244543	Central Indonesia	Hap_41	maxima
Nuryanto & Kochzius 2009	FM244544	Central Indonesia	Hap_42	maxima
Nuryanto & Kochzius 2009	FM244545	Central Indonesia	Hap_43	maxima
Nuryanto & Kochzius 2009	FM244546	Central Indonesia	Hap_44	maxima
Nuryanto & Kochzius 2009	FM244547	Central Indonesia	Hap_45	maxima
Nuryanto & Kochzius 2009	FM244548	Central Indonesia	Hap_46	maxima
Nuryanto & Kochzius 2009	FM244549	Central Indonesia	Hap_47	maxima
Nuryanto & Kochzius 2009	FM244550	Central Indonesia	Hap_48	maxima
Nuryanto & Kochzius 2009	FM244551	Central Indonesia	Hap_49	maxima
Nuryanto & Kochzius 2009	FM244552	Central Indonesia	Hap_50	maxima
Nuryanto & Kochzius 2009	FM244553	Central Indonesia	Hap_51	maxima
Nuryanto & Kochzius 2009	FM244554	Central Indonesia	Hap_52	maxima
Nuryanto & Kochzius 2009	FM244555	Central Indonesia	Hap_53	maxima
Nuryanto & Kochzius 2009	FM244556	Central Indonesia	Hap_54	maxima
Nuryanto & Kochzius 2009	FM244557	Central Indonesia	Hap_55	maxima
Nuryanto & Kochzius 2009	FM244558	Central Indonesia	Hap_56	maxima
Nuryanto & Kochzius 2009	FM244559	Central Indonesia	Hap_57	maxima
Nuryanto & Kochzius 2009	FM244560	Central Indonesia	Hap_58	maxima
Nuryanto & Kochzius 2009	FM244561	Central Indonesia	Hap_59	maxima
Nuryanto & Kochzius 2009	FM244562	Central Indonesia	Hap_60	maxima
Nuryanto & Kochzius 2009	FM244563	Central Indonesia	Hap_61	maxima
Nuryanto & Kochzius 2009	FM244564	Central Indonesia	Hap_62	maxima
Nuryanto & Kochzius 2009	FM244565	Central Indonesia	Hap_63	maxima
Nuryanto & Kochzius 2009	FM244566	Central Indonesia	Hap_64	maxima
Nuryanto & Kochzius 2009	FM244567	Central Indonesia	Hap_65	maxima
Nuryanto & Kochzius 2009	FM244568	Central Indonesia	Hap_66	maxima
Nuryanto & Kochzius 2009	FM244569	Central Indonesia	Hap_67	maxima
Nuryanto & Kochzius 2009	FM244570	Central Indonesia	Hap_68	maxima
Nuryanto & Kochzius 2009	FM244571	Central Indonesia	Hap_69	maxima
Nuryanto & Kochzius 2009	FM244572	Central Indonesia	Hap_70	maxima
Nuryanto & Kochzius 2009	FM244573	Central Indonesia	Hap_71	maxima
Nuryanto & Kochzius 2009	FM244574	Central Indonesia	Hap_72	maxima
Nuryanto & Kochzius 2009	FM244575	Central Indonesia	Hap_73	maxima
Nuryanto & Kochzius 2009	FM244576	Central Indonesia	Hap_74	maxima
Nuryanto & Kochzius 2009	FM244577	Central Indonesia	Hap_75	maxima
Nuryanto & Kochzius 2009	FM244578	Central Indonesia	Hap_76	maxima
Nuryanto & Kochzius 2009	FM244579	Central Indonesia	Hap_77	maxima
Nuryanto & Kochzius 2009	FM244580	Central Indonesia	Hap_78	maxima
Nuryanto & Kochzius 2009	FM244581	Central Indonesia	Hap_79	maxima
Nuryanto & Kochzius 2009	FM244582	Central Indonesia	Hap_80	maxima
Nuryanto & Kochzius 2009	FM244583	Central Indonesia	Hap_81	maxima
Nuryanto & Kochzius 2009	FM244584	Central Indonesia	Hap_82	maxima
Nuryanto & Kochzius 2009	FM244585	Central Indonesia	Hap_83	maxima
Nuryanto & Kochzius 2009	FM244586	Central Indonesia	Hap_84	maxima
Nuryanto & Kochzius 2009	FM244587	Central Indonesia	Hap_85	maxima
Nuryanto & Kochzius 2009	FM244588	Central Indonesia	Hap_86	maxima
Nuryanto & Kochzius 2009	FM244589	Central Indonesia	Hap_87	maxima
Nuryanto & Kochzius 2009	FM244590	Central Indonesia	Hap_88	maxima
Nuryanto & Kochzius 2009	FM244591	Central Indonesia	Hap_89	maxima
Nuryanto & Kochzius 2009	FM244592	Central Indonesia	Hap_90	maxima
Nuryanto & Kochzius 2009	FM244593	Central Indonesia	Hap_91	maxima
Nuryanto & Kochzius 2009	FM244594	Central Indonesia	Hap_92	maxima
Nuryanto & Kochzius 2009	FM244595	Central Indonesia	Hap_93	maxima
Nuryanto & Kochzius 2009	FM244596	Central Indonesia	Hap_94	maxima
Nuryanto & Kochzius 2009	FM244597	Central Indonesia	Hap_95	maxima
Nuryanto & Kochzius 2009	FM244598	Central Indonesia	Hap_96	maxima
Nuryanto & Kochzius 2009	FM244599	Central Indonesia	Hap_97	maxima
Nuryanto & Kochzius 2009	FM244600	Central Indonesia	Hap_98	maxima
Nuryanto & Kochzius 2009	FM244601	Central Indonesia	Hap_99	maxima
Nuryanto & Kochzius 2009	FM244602	Central Indonesia	Hap_100	maxima
Nuryanto & Kochzius 2009	FM244603	Central Indonesia	Hap_101	maxima
Nuryanto & Kochzius 2009	FM244604	Central Indonesia	Hap_102	maxima
Nuryanto & Kochzius 2009	FM244605	Central Indonesia	Hap_103	maxima
Nuryanto & Kochzius 2009	FM244606	Central Indonesia	Hap_104	maxima
Nuryanto & Kochzius 2009	FM244607	Indonesia-Biak	Hap_105_yell	maxima
Nuryanto & Kochzius 2009	FM244608	Indonesia-Biak	Hap_106_yell	maxima
Nuryanto & Kochzius 2009	FM244609	Indonesia-Biak	Hap_107_yell	maxima
Nuryanto & Kochzius 2009	FM244610	Indonesia-Biak	Hap_108_yell	maxima
Nuryanto & Kochzius 2009	FM244611	Indonesia-Biak	Hap_109_yell	maxima
Nuryanto & Kochzius 2009	FM244612	Indonesia-Biak	Hap_110_yell	maxima
Nuryanto & Kochzius 2009	FM244613	Indonesia-Biak	Hap_111_yell	maxima
Nuryanto & Kochzius 2009	FM244614	Indonesia-Biak	Hap_112_yell	maxima
Nuryanto & Kochzius 2009	FM244615	Indonesia-Biak	Hap_113_yell	maxima
Nuryanto & Kochzius 2009	FM244616	Indonesia	Hap_114	maxima
Nuryanto & Kochzius 2009	FM244617	Indonesia-Biak	Hap_115_yell	maxima
Nuryanto & Kochzius 2009	FM244618	Indonesia-Biak	Hap_116_yell	maxima
Nuryanto & Kochzius 2009	FM244619	Indonesia	Hap_117	maxima
Tang & Chen, unpublished	DQ168140	Taiwan	Tridacna sp.	sp.
Nuryanto et al. 2007	EU003615	Red Sea	RedSea01	squamosa
DeBoer et al. unpublished	EU346361	Indonesia	TSD50	squamosa
DeBoer et al. unpublished	EU346362	Indonesia	TSD51	squamosa
DeBoer et al. unpublished	EU346363	Indonesia	TSD52	squamosa
Neo & Todd 2012	JN392020	Singapore	NML_53	squamosa
Neo & Todd 2012	JN392021	Singapore	NML_54	squamosa
Neo & Todd 2012	JN392022	Singapore	NML_44	squamosa
Neo & Todd 2012	JN392023	Singapore	NML_55	squamosa
Neo & Todd 2012	JN392024	Singapore	NML_50	squamosa
Neo & Todd 2012	JN392025	Singapore	NML_49	squamosa
Neo & Todd 2012	JN392026	Singapore	NML_48	squamosa
Neo & Todd 2012	JN392027	Singapore	NML_51	squamosa
Neo & Todd 2012	JN392028	Singapore	NML_52	squamosa
Neo & Todd 2012	JN392029	Singapore	NML_46	squamosa
Neo & Todd 2012	JN392030	Singapore	NML_25	squamosa
Neo & Todd 2012	JN392031	Singapore	NML_45	squamosa
Neo & Todd 2012	JN392032	Singapore	NML_28	squamosa
Neo & Todd 2012	JN392033	Singapore	NML_47	squamosa
Neo & Todd 2012	JN392034	Singapore	NML_21	squamosa
Neo & Todd 2012	JN392035	Singapore	NML_26	squamosa
Neo & Todd 2012	JN392036	Singapore	NML_22	squamosa
Neo & Todd 2012	JN392037	Singapore	NML_24	squamosa
Neo & Todd 2012	JN392038	Singapore	NML_23	squamosa
Neo & Todd 2012	JN392039	Singapore	NML_27	squamosa
Ladhar-Chaabouni et al., 2010.	FJ179505			Cerastoderma glaucum
Kirkendale & Middelfart, unpublished	FJ745302			Fragum sueziense
Kirkendale & Middelfart, unpublished	FJ745346			Corculum cardiss
Huelsken et al. (present study)	JX974903	Ningaloo, Western Australia	ET781_NIN_spp	sp.	-23.2522	113.784
Huelsken et al. (present study)	JX974904	Ningaloo, Western Australia	ET782_NIN_spp	sp.	-23.2522	113.784
Huelsken et al. (present study)	JX974905	Ningaloo, Western Australia	ET783_NIN_spp	sp.	-23.2522	113.784
Huelsken et al. (present study)	JX974906	Ningaloo, Western Australia	ET790_NIN_spp	sp.	-23.2522	113.784
Huelsken et al. (present study)	JX974907	Ningaloo, Western Australia	ET916_NIN_spp	sp.	-23.1746	113.765
Huelsken et al. (present study)	JX974908	Ningaloo, Western Australia	ET918_NIN_spp	sp.	-23.1746	113.765
Huelsken et al. (present study)	JX974909	Ningaloo, Western Australia	ET919_NIN_spp	sp.	-23.1746	113.765
Huelsken et al. (present study)	JX974910	Ningaloo, Western Australia	ET920_NIN_spp	sp.	-23.1746	113.765
Huelsken et al. (present study)	JX974911	Ningaloo, Western Australia	ET921_NIN_spp	sp.	-23.1746	113.765
Huelsken et al. (present study)	JX974912	Ningaloo, Western Australia	ET927_NIN_spp	sp.	-23.1438	113.795
Huelsken et al. (present study)	JX974913	Ningaloo, Western Australia	ET929_NIN_spp	sp.	-23.1438	113.795
Huelsken et al. (present study)	JX974914	Ningaloo, Western Australia	ET930_NIN_spp	sp.	-23.1438	113.795
Huelsken et al. (present study)	JX974915	Ningaloo, Western Australia	ET933_NIN_spp	sp.	-23.1438	113.795
Huelsken et al. (present study)	JX974916	Ningaloo, Western Australia	ET935_NIN_spp	sp.	-23.1438	113.795
Huelsken et al. (present study)	JX974917	Ningaloo, Western Australia	ET937_NIN_spp	sp.	-23.1438	113.795
Huelsken et al. (present study)	JX974918	Solomon Islands	ET2272_SOL_spp	sp.	-8.32853	157.163
Huelsken et al. (present study)	JX974919	Solomon Islands	ET2339_SOL_spp	sp.	-8.37492	157.515
Huelsken et al. (present study)	JX974920	Solomon Islands	ET2422_SOL_spp	sp.	-8.78856	158.252
Huelsken et al. (present study)	JX974921	Solomon Islands	ET2425_SOL_spp	sp.	-8.78856	158.252
Huelsken et al. (present study)	JX974922	Solomon Islands	ET2452_SOL_spp	sp.	-8.74517	158.216
Huelsken et al. (present study)	JX974923	Solomon Islands	ET2454_SOL_spp	sp.	-8.74517	158.216
Huelsken et al. (present study)	JX974924	Torres Strait, Australia	ET1961_TOR_squa	squamosa	-10.4178	142.251
Huelsken et al. (present study)	JX974925	Lihou Reef, Coral Sea, Australia	ET358_LIH_squa	squamosa	-17.4132	151.875
Huelsken et al. (present study)	JX974926	Torres Strait, Australia	ET1995_TOR_max	maxima	-10.5437	142.347
Huelsken et al. (present study)	JX974927	Torres Strait, Australia	ET2006_TOR_max	maxima	-10.5437	142.347
Huelsken et al. (present study)	JX974928	Torres Strait, Australia	ET2011_TOR_max	maxima	-10.4473	142.217
Huelsken et al. (present study)	JX974929	Torres Strait, Australia	ET2015_TOR_max	maxima	-10.4473	142.217
Huelsken et al. (present study)	JX974930	Solomon Islands	ET2145_SOL_max	maxima	-8.34555	157.367
Huelsken et al. (present study)	JX974931	Solomon Islands	ET2348_SOL_max	maxima	-8.10067	156.868
Huelsken et al. (present study)	JX974932	Solomon Islands	ET2386_SOL_max	maxima	-8.29808	157.518
Huelsken et al. (present study)	JX974933	Solomon Islands	ET2395_SOL_max	maxima	-8.74517	158.216
Huelsken et al. (present study)	JX974934	Heron Island, Australia	ET26_HER_max	maxima	-23.4449	151.912
Huelsken et al. (present study)	JX974935	Lizard Island, Australia	ET2793_LIZ_max	maxima	-14.701	145.451
Huelsken et al. (present study)	JX974936	Lihou Reef, Coral Sea, Australia	ET303_LIH_max	maxima	-17.5935	151.5
Huelsken et al. (present study)	JX974937	Lihou Reef, Coral Sea, Australia	ET305_LIH_max	maxima	-17.5935	151.5
Huelsken et al. (present study)	JX974938	Lihou Reef, Coral Sea, Australia	ET357_LIH_max	maxima	-17.4132	151.875
Huelsken et al. (present study)	JX974939	Lihou Reef, Coral Sea, Australia	ET375_LIH_max	maxima	-17.1253	151.825
Huelsken et al. (present study)	JX974940	Heron Island, Australia	ET43_HER_max	maxima	-23.4396	151.974
Huelsken et al. (present study)	JX974941	Heron Island, Australia	ET49_HER_max	maxima	-23.4396	151.974
Huelsken et al. (present study)	JX974942	Lizard Island, Australia	ET650_LIZ_max	maxima	-14.7015	145.451
Huelsken et al. (present study)	JX974943	Lizard Island, Australia	ET654_LIZ_max	maxima	-14.7015	145.451
Huelsken et al. (present study)	JX974944	Lizard Island, Australia	ET655_LIZ_max	maxima	-14.7015	145.451
Huelsken et al. (present study)	JX974945	Torres Strait, Australia	ET1879_TOR_croc	crocea	-10.5437	142.347
Huelsken et al. (present study)	JX974946	Torres Strait, Australia	ET1880_TOR_croc	crocea	-10.5437	142.347
Huelsken et al. (present study)	JX974947	Torres Strait, Australia	ET1884_TOR_croc	crocea	-10.5437	142.347
Huelsken et al. (present study)	JX974948	Torres Strait, Australia	ET1885_TOR_croc	crocea	-10.5437	142.347
Huelsken et al. (present study)	JX974949	Solomon Islands	ET2180_SOL_croc	crocea	-8.34658	157.56
Huelsken et al. (present study)	JX974950	Solomon Islands	ET2198_SOL_croc	crocea	-8.33857	157.503
Huelsken et al. (present study)	JX974951	Solomon Islands	ET2333_SOL_croc	crocea	-8.38793	157.524
Huelsken et al. (present study)	JX974952	Solomon Islands	ET2334_SOL_croc	crocea	-8.38793	157.524
Huelsken et al. (present study)	JX974953	Lizard Island, Australia	ET527_LIZ_croc	crocea	-14.6851	145.443
Huelsken et al. (present study)	JX974954	Lizard Island, Australia	ET529_LIZ_croc	crocea	-14.6851	145.443
Huelsken et al. (present study)	JX974955	Lizard Island, Australia	ET542_LIZ_croc	crocea	-14.6474	145.453
Huelsken et al. (present study)	JX974956	Lizard Island, Australia	ET544_LIZ_croc	crocea	-14.6474	145.453
Huelsken et al. (present study)	JX974957	Lihou Reef, Coral Sea, Australia	ET356_LIH_dera	derasa	-17.4132	151.875

## Sheet: 16S
16S
Study Source	Acc No	Locality	Name used in study	Putative species	Latitude (decimal degrees)	Longitude (decimal degrees)
Study Source	Acc No	Locality	Study name	Putative species
Richter et al. 2008	AM909726	Jordan (RedSea)	Star1	costata
Richter et al. 2008	AM909727	Jordan (RedSea)	Star2	costata
Richter et al. 2008	AM909728	Jordan (RedSea)	Star3	costata
Richter et al. 2008	AM909729	Jordan (RedSea)	Star4	costata
Richter et al. 2008	AM909730	Jordan (RedSea)	Star5	costata
Richter et al. 2008	AM909731	Jordan (RedSea)	Star6	costata
Richter et al. 2008	AM909732	Jordan (RedSea)	Star10	costata
Richter et al. 2008	AM909733	Egypt (RedSea)	Tnov015	costata
Richter et al. 2008	AM909734	Egypt (RedSea)	Tnov01	costata
Richter et al. 2008	AM909735	Egypt (RedSea)	Tnov026	costata
Richter et al. 2008	AM909736	Egypt (RedSea)	Tnov02	costata
Richter et al. 2008	AM909737	Egypt (RedSea)	Tnov037	costata
Richter et al. 2008	AM909738	Egypt (RedSea)	Tnov03	costata
Richter et al. 2008	AM909739	Egypt (RedSea)	Tnov048	costata
Richter et al. 2008	AM909740	Egypt (RedSea)	Tnov04	costata
Richter et al. 2008	AM909741	Egypt (RedSea)	Tnov059	costata
DeBoer et al. 2008	EU341331	Indonesia	TSD_1 (black)	crocea
DeBoer et al. 2008	EU341332	Indonesia	TSD_2 (black)	crocea
DeBoer et al. 2008	EU341333	Indonesia	TSD_3 (black)	crocea
DeBoer et al. 2008	EU341336	Indonesia	TSD_6 (black)	crocea
DeBoer et al. 2008	EU341337	Indonesia	TSD_7 (grey)	crocea
DeBoer et al. 2008	EU341339	Indonesia	TSD_9 (black)	crocea
DeBoer et al. 2008	EU341340	Indonesia	TSD_10 (grey)	crocea
DeBoer et al. 2008	EU341341	Indonesia	TSD_11 (black)	crocea
DeBoer et al. 2008	EU341342	Indonesia	TSD_12 (grey)	crocea
DeBoer et al. 2008	EU341344	Indonesia	TSD_14 (black)	crocea
DeBoer et al. 2008	EU341346	Indonesia	TSD_16 (white)	crocea
DeBoer et al. 2008	EU341347	Indonesia	TSD_17 (white)	crocea
DeBoer et al. 2008	EU341348	Indonesia	TSD_18 (black)	crocea
DeBoer et al. 2008	EU341349	Indonesia	TSD_19 (white)	crocea
Schneider & O'Foighil 1999	AF122980	aquarium store		crocea
Richter et al. 2008	AM909763	Indonesia	Tcr232_6	crocea
Richter et al. 2008	AM909764	Indonesia	Tcr232_7	crocea
Schneider & O'Foighil 1999	AF122976	aquarium store		derasa
Schneider & O'Foighil 1999	AF122975	aquarium store		gigas
DeBoer et al. 2008	EU341334	Indonesia	TSD_4	maxima
DeBoer et al. 2008	EU341335	Indonesia	TSD_5	maxima
DeBoer et al. 2008	EU341343	Indonesia	TSD_13	maxima
Richter et al. 2008	AM909742	Jordan (RedSea)	Tmax03	maxima
Richter et al. 2008	AM909743	Jordan (RedSea)	Tmax04	maxima
Richter et al. 2008	AM909744	Jordan (RedSea)	Tmax06	maxima
Richter et al. 2008	AM909745	Jordan (RedSea)	Tmax01CR	maxima
Richter et al. 2008	AM909746	Jordan (RedSea)	Tmax02CR	maxima
Richter et al. 2008	AM909747	Jordan (RedSea)	Tmax03CR	maxima
Richter et al. 2008	AM909748	Egypt (RedSea)	Tmax01Hu	maxima
Richter et al. 2008	AM909749	Indonesia	TmaInd12	maxima
Richter et al. 2008	AM909750	Indonesia	TmaInd13	maxima
Richter et al. 2008	AM909751	Egypt (RedSea)	Tmax02Eg	maxima
Richter et al. 2008	AM909752	Egypt (RedSea)	Tmax3Eg	maxima
Tang & Chen unpub	DQ115320	Taiwan		maxima
Schneider & O'Foighil 1999	AF122979	aquarium store		maxima
Tang & Chen unpub	DQ119339	Taiwan	YCT-2005	sp
DeBoer et al. 2008	EU341338	Indonesia	TSD_8	squamosa
DeBoer et al. 2008	EU341345	Indonesia	TSD_15	squamosa
Richter et al. 2008	AM909753	Jordan (RedSea)	Tsqua17	squamosa
Richter et al. 2008	AM909754	Jordan (RedSea)	Tsqua27	squamosa
Richter et al. 2008	AM909755	Jordan (RedSea)	Tsqua42	squamosa
Richter et al. 2008	AM909756	Jordan (RedSea)	Tsqua49	squamosa
Richter et al. 2008	AM909757	Jordan (RedSea)	Tsqua56	squamosa
Richter et al. 2008	AM909758	Jordan (RedSea)	Tsqua65	squamosa
Richter et al. 2008	AM909759	Jordan (RedSea)	Tsqua67	squamosa
Richter et al. 2008	AM909760	Jordan (RedSea)	Tsqua81	squamosa
Richter et al. 2008	AM909761	Jordan (RedSea)	Tsqua04	squamosa
Richter et al. 2008	AM909762	Jordan (RedSea)	Tsq61_3	squamosa
Schneider & O'Foighil 1999	AF122978	aquarium store		squamosa
Schneider & O'Foighil 1999	AF122977	aquarium store		tevoroa
Huelsken et al. (present study)	JX974838	Ningaloo, Western Australia	ET784	squamosa	-23.2522	113.784
Huelsken et al. (present study)	JX974839	Ningaloo, Western Australia	ET786	squamosa	-23.2522	113.784
Huelsken et al. (present study)	JX974840	Torres Strait, Australia	ET1961	squamosa	-10.4178	142.251
Huelsken et al. (present study)	JX974841	Lihou Reef, Coral Sea, Australia	ET358	squamosa	-17.4132	151.875
Huelsken et al. (present study)	JX974842	Lihou Reef, Coral Sea, Australia	ET309	squamosa	-17.5925	151.495
Huelsken et al. (present study)	JX974843	Torres Strait, Australia	ET1995	maxima	-10.5437	142.347
Huelsken et al. (present study)	JX974844	Torres Strait, Australia	ET2006	maxima	-10.5437	142.347
Huelsken et al. (present study)	JX974845	Torres Strait, Australia	ET2011	maxima	-10.5437	142.347
Huelsken et al. (present study)	JX974846	Torres Strait, Australia	ET2015	maxima	-10.5437	142.347
Huelsken et al. (present study)	JX974847	Solomon Islands	ET2145	maxima	-8.34555	157.367
Huelsken et al. (present study)	JX974848	Solomon Islands	ET2348	maxima	-8.10067	156.868
Huelsken et al. (present study)	JX974849	Solomon Islands	ET2386	maxima	-8.29808	157.518
Huelsken et al. (present study)	JX974850	Solomon Islands	ET2395	maxima	-8.74517	158.216
Huelsken et al. (present study)	JX974851	Lizard Island, Australia	ET654	maxima	-14.7015	145.451
Huelsken et al. (present study)	JX974852	Lizard Island, Australia	ET655	maxima	-14.7015	145.451
Huelsken et al. (present study)	JX974853	Lizard Island, Australia	ET2793	maxima	-14.701	145.451
Huelsken et al. (present study)	JX974854	Lizard Island, Australia	ET2789	maxima	-14.701	145.451
Huelsken et al. (present study)	JX974855	Lihou Reef, Coral Sea, Australia	ET303	maxima	-17.5935	151.5
Huelsken et al. (present study)	JX974856	Lihou Reef, Coral Sea, Australia	ET305	maxima	-17.5935	151.5
Huelsken et al. (present study)	JX974857	Lihou Reef, Coral Sea, Australia	ET357	maxima	-17.4132	151.875
Huelsken et al. (present study)	JX974858	Heron Island, Australia	ET43	maxima	-23.4396	151.974
Huelsken et al. (present study)	JX974859	Heron Island, Australia	ET49	maxima	-23.4396	151.974
Huelsken et al. (present study)	JX974860	Heron Island, Australia	ET21	maxima	-23.4449	151.912
Huelsken et al. (present study)	JX974861	Torres Strait, Australia	ET1879	crocea	-10.5437	142.347
Huelsken et al. (present study)	JX974862	Torres Strait, Australia	ET1880	crocea	-10.5437	142.347
Huelsken et al. (present study)	JX974863	Torres Strait, Australia	ET1884	crocea	-10.5437	142.347
Huelsken et al. (present study)	JX974864	Torres Strait, Australia	ET1885	crocea	-10.5437	142.347
Huelsken et al. (present study)	JX974865	Solomon Islands	ET2180	crocea	-8.34658	157.56
Huelsken et al. (present study)	JX974866	Solomon Islands	ET2198	crocea	-8.33857	157.503
Huelsken et al. (present study)	JX974867	Solomon Islands	ET2333	crocea	-8.38793	157.524
Huelsken et al. (present study)	JX974868	Solomon Islands	ET2334	crocea	-8.38793	157.524
Huelsken et al. (present study)	JX974869	Lizard Island, Australia	ET527	crocea	-14.6851	145.443
Huelsken et al. (present study)	JX974870	Lizard Island, Australia	ET529	crocea	-14.6851	145.443
Huelsken et al. (present study)	JX974871	Lizard Island, Australia	ET542	crocea	-14.6474	145.453
Huelsken et al. (present study)	JX974872	Lizard Island, Australia	ET544	crocea	-14.6474	145.453
Huelsken et al. (present study)	JX974873	Ningaloo, Western Australia	ET781	sp	-23.2522	113.784
Huelsken et al. (present study)	JX974874	Ningaloo, Western Australia	ET782	sp	-23.2522	113.784
Huelsken et al. (present study)	JX974875	Ningaloo, Western Australia	ET783	sp	-23.2522	113.784
Huelsken et al. (present study)	JX974876	Ningaloo, Western Australia	ET790	sp	-23.2522	113.784
Huelsken et al. (present study)	JX974877	Ningaloo, Western Australia	ET916	sp	-23.1746	113.765
Huelsken et al. (present study)	JX974878	Ningaloo, Western Australia	ET918	sp	-23.1746	113.765
Huelsken et al. (present study)	JX974879	Ningaloo, Western Australia	ET920	sp	-23.1746	113.765
Huelsken et al. (present study)	JX974880	Ningaloo, Western Australia	ET921	sp	-23.1746	113.765
Huelsken et al. (present study)	JX974881	Ningaloo, Western Australia	ET927	sp	-23.1438	113.795
Huelsken et al. (present study)	JX974882	Ningaloo, Western Australia	ET935	sp	-23.1438	113.795
Huelsken et al. (present study)	JX974883	Ningaloo, Western Australia	ET937	sp	-23.1438	113.795
Huelsken et al. (present study)	JX974884	Ningaloo, Western Australia	ET917	sp	-23.1746	113.765
Huelsken et al. (present study)	JX974885	Ningaloo, Western Australia	ET923	sp	-23.1438	113.795
Huelsken et al. (present study)	JX974886	Ningaloo, Western Australia	ET924	sp	-23.1438	113.795
Huelsken et al. (present study)	JX974887	Ningaloo, Western Australia	ET925	sp	-23.1438	113.795
Huelsken et al. (present study)	JX974888	Ningaloo, Western Australia	ET926	sp	-23.1438	113.795
Huelsken et al. (present study)	JX974889	Ningaloo, Western Australia	ET928	sp	-23.1438	113.795
Huelsken et al. (present study)	JX974890	Ningaloo, Western Australia	ET931	sp	-23.1438	113.795
Huelsken et al. (present study)	JX974891	Ningaloo, Western Australia	ET932	sp	-23.1438	113.795
Huelsken et al. (present study)	JX974892	Ningaloo, Western Australia	ET933	sp	-23.1438	113.795
Huelsken et al. (present study)	JX974893	Solomon Islands	ET2175	sp	-8.34658	157.56
Huelsken et al. (present study)	JX974894	Solomon Islands	ET2450	sp	-8.74517	158.216
Huelsken et al. (present study)	JX974895	Solomon Islands	ET2339	sp	-8.37492	157.515
Huelsken et al. (present study)	JX974896	Solomon Islands	ET2422	sp	-8.78856	158.252
Huelsken et al. (present study)	JX974897	Solomon Islands	ET2425	sp	-8.78856	158.252
Huelsken et al. (present study)	JX974898	Solomon Islands	ET2454	sp	-8.74517	158.216
Huelsken et al. (present study)	JX974899	Lihou Reef, Coral Sea, Australia	ET306	derasa	-17.5935	151.5
Huelsken et al. (present study)	JX974900	Lihou Reef, Coral Sea, Australia	ET307	derasa	-17.5935	151.5
Huelsken et al. (present study)	JX974901	Lihou Reef, Coral Sea, Australia	ET308	derasa	-17.5935	151.5
Huelsken et al. (present study)	JX974902	Lihou Reef, Coral Sea, Australia	ET356	derasa	-17.4132	151.875

## Sheet: ITS
ITS
Study Source		Acc No	Name used in study	Putative species	Locality	Latitude (decimal degrees)	Longitude (decimal degrees)
Huelsken et al. (present study)		JX974958	ET309	squamosa	Lihou Reef, Coral Sea, Australia	-17.5925	151.495
Huelsken et al. (present study)		JX974959	ET358	squamosa	Lihou Reef, Coral Sea, Australia	-17.4132	151.875
Huelsken et al. (present study)		JX974960	ET1961	squamosa	Torres Strait, Australia	-10.4178	142.251
Huelsken et al. (present study)		JX974961	ET556	crocea	Lizard Island, Australia	-14.6517	145.451
Huelsken et al. (present study)		JX974962	ET543	crocea	Lizard Island, Australia	-14.6474	145.453
Huelsken et al. (present study)		JX974963	ET765	sp.	Ningaloo, Western Australia	-23.1438	113.795
Huelsken et al. (present study)		JX974964	ET918	sp.	Ningaloo, Western Australia	-23.1746	113.765
Huelsken et al. (present study)		JX974965	ET766	sp.	Ningaloo, Western Australia	-23.1438	113.795
Huelsken et al. (present study)		JX974966	ET781	sp.	Ningaloo, Western Australia	-23.2522	113.784
Huelsken et al. (present study)		JX974967	ET783	sp.	Ningaloo, Western Australia	-23.2522	113.784
Huelsken et al. (present study)		JX974969	ET1896	maxima	Torres Strait, Australia	-10.5437	142.347
Huelsken et al. (present study)		JX974970	ET1921	maxima	Torres Strait, Australia	-10.4327	142.182
Huelsken et al. (present study)		JX974971	ET1923	maxima	Torres Strait, Australia	-10.4764	142.241
Huelsken et al. (present study)		JX974972	ET1993	maxima	Torres Strait, Australia	-10.5437	142.347
Huelsken et al. (present study)		JX974973	ET1995	maxima	Torres Strait, Australia	-10.5437	142.347
Huelsken et al. (present study)		JX974974	ET2011	maxima	Torres Strait, Australia	-10.4473	142.217
Huelsken et al. (present study)		JX974975	ET2016	maxima	Torres Strait, Australia	-10.4473	142.217
Huelsken et al. (present study)		JX974976	ET21	maxima	Heron Island, Australi	-23.4449	151.912
Huelsken et al. (present study)		JX974977	ET22	maxima	Heron Island, Australi	-23.4449	151.912
Huelsken et al. (present study)		JX974978	ET657	maxima	Lizard Island, Australia	-14.7015	145.451
Huelsken et al. (present study)		JX974979	ET658	maxima	Lizard Island, Australia	-14.7015	145.451
Huelsken et al. (present study)		JX974980	ET659	maxima	Lizard Island, Australia	-14.6917	145.465
Huelsken et al. (present study)		JX974981	ET660	maxima	Lizard Island, Australia	-14.6917	145.465
Huelsken et al. (present study)		JX974982	ET661	maxima	Lizard Island, Australia	-14.6917	145.465
Huelsken et al. (present study)		JX974968	ET2272	maxima	Solomon Islands	-8.32853	157.163
Huelsken et al. (present study)		JX974983	ET2386	maxima	Solomon Islands	-8.29808	157.518
Huelsken et al. (present study)		JX974984	ET2424	maxima	Solomon Islands	-8.78856	158.252
Huelsken et al. (present study)		JX974985	ET2793	maxima	Lizard Island, Australia	-14.701	145.451
Huelsken et al. (present study)		JX974986	ET300	maxima	Lihou Reef, Coral Sea, Australia	-17.599	151.488
Huelsken et al. (present study)		JX974987	ET301	maxima	Lihou Reef, Coral Sea, Australia	-17.599	151.488
Huelsken et al. (present study)		JX974988	ET303	maxima	Lihou Reef, Coral Sea, Australia	-17.5935	151.5
Huelsken et al. (present study)		JX974989	ET310	maxima	Lihou Reef, Coral Sea, Australia	-17.5925	151.495
Huelsken et al. (present study)		JX974990	ET374	maxima	Lihou Reef, Coral Sea, Australia	-17.1253	151.825
Huelsken et al. (present study)		JX974991	ET375	maxima	Lihou Reef, Coral Sea, Australia	-17.1253	151.825
Huelsken et al. (present study)		JX974992	ET377	maxima	Lihou Reef, Coral Sea, Australia	-17.4033	151.899
Huelsken et al. (present study)		JX974993	ET648	maxima	Lizard Island, Australia	-14.7015	145.451
Huelsken et al. (present study)		JX974994	ET650	maxima	Lizard Island, Australia	-14.7015	145.451
Huelsken et al. (present study)		JX974995	ET652	maxima	Lizard Island, Australia	-14.7015	145.451
Huelsken et al. (present study)		JX974996	ET653	maxima	Lizard Island, Australia	-14.7015	145.451
Huelsken et al. (present study)		JX974997	ET47	maxima	Heron Island, Australi	-23.4396	151.974
Huelsken et al. (present study)		JX974998	ET44	maxima	Heron Island, Australi	-23.4396	151.974
Huelsken et al. (present study)		JX974999	ET46	maxima	Heron Island, Australi	-23.4396	151.974
Huelsken et al. (present study)		JX975000	ET2014	maxima	Torres Strait, Australia	-10.4473	142.217
Huelsken et al. (present study)		JX975001	ET2017	maxima	Torres Strait, Australia	-10.4473	142.217
Huelsken et al. (present study)		JX975002	ET2018	maxima	Torres Strait, Australia	-10.4473	142.217
Huelsken et al. (present study)		JX975003	ET306	derasa	Lihou Reef, Coral Sea, Australia	-17.5935	151.5
Huelsken et al. (present study)		JX975004	ET656	derasa	Lizard Island, Australia	-14.7015	145.451
Huelsken et al. (present study)		JX975005	ET308	derasa	Lihou Reef, Coral Sea, Australia	-17.5935	151.5
Huelsken et al. (present study)		JX975006	ET356	derasa	Lihou Reef, Coral Sea, Australia	-17.4132	151.875
Huelsken et al. (present study)		JX975007	ET307	derasa	Lihou Reef, Coral Sea, Australia	-17.5935	151.5
